# Supplementary material for: Factors Associated With County-Level Variation in Premature Mortality Due to Noncommunicable Chronic Disease in the United States, 1999-2017
Source: PubMed Central journal article supplement (PMC7049090; doi:10.1001/jamanetworkopen.2020.0241), 2020-02-28
Supplement: jamanetwopen-3-e200241-s001.pdf [file jamanetwopen-3-e200241-s001.pdf]

## Supplementary Online Content

Song S, Trisolini MG, LaBresh KA, Smith Jr SC, Jin Y, Zheng Z-J. Factors associated with county-level variation in premature mortality due to noncommunicable chronic disease in the United States, 1999-2017. 2020;3(2):e200241. *JAMA Netw Open*. doi:10.1001/jamanetworkopen.2020.0241

**eFigure.** Trends in County-Level, Age-Adjusted NCD Premature Mortality by Race/Ethnicity Groups, 1999-2017

**eTable 1.** Results of ITS on Trends in County-Level, Age-Adjusted NCD Premature Mortality by Income Groups in Four US Regions, 1999-2017

**eTable 2.** Results of ITS on Trends in County-Level, Age-Adjusted NCD Premature Mortality by Race/Ethnic Groups, 1999-2017

This supplementary material has been provided by the authors to give readers additional information about their work.

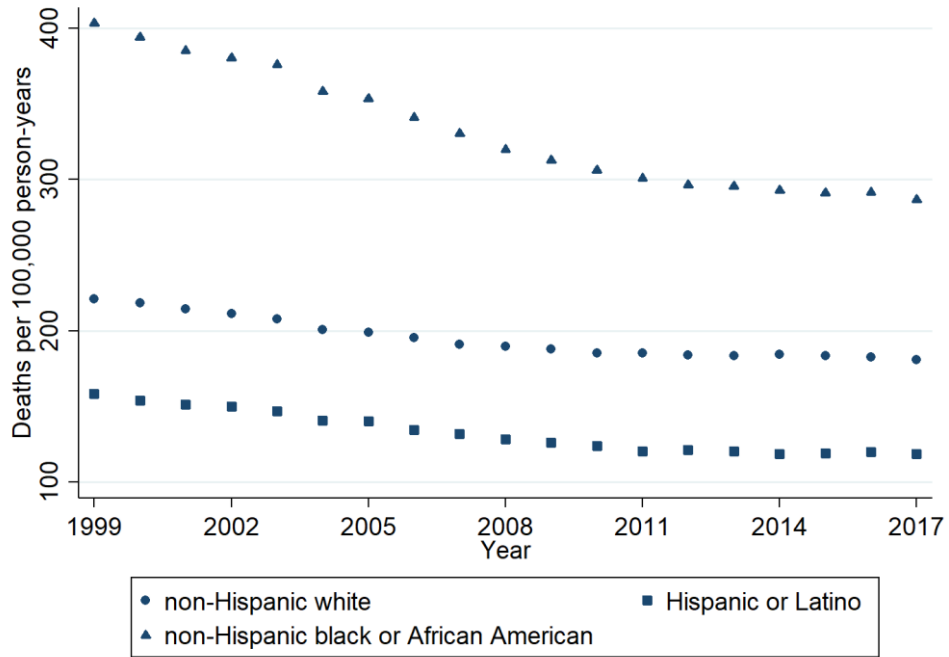

Note: Interrupted Time Series was used to test the trend of the mortality rate in each race/ethnic group. The mortality showed a significantly decrease trend in every race/ethnicity group from 1999 to 2010. The mortality showed a significantly slowly decrease trend in each group from 2010 to 2017. The results of ITS were showed in eTable 2.

**eFigure.** Trends in county-level, age-adjusted NCD premature mortality by race/ethnicity groups, 1999-2017

**eTable 1** Results of ITS on trends in county-level, age-adjusted NCD premature mortality by income groups in four US Regions, 1999-2017

| Group                      | Trend prior 2010 |         | Trend post 2010 |         |
|----------------------------|------------------|---------|-----------------|---------|
|                            | Coefficient      | p-value | Coefficient     | p-value |
| Midwest & Low income       | -1.84**          | 0.02    | 1.16            | 0.11    |
| Midwest & Average income   | -4.45***         | <0.001  | 0.43**          | 0.04    |
| Midwest & High income      | -3.81***         | <0.001  | -0.22           | 0.54    |
| Northeast & Low income     | -3.25***         | 0.001   | -0.24           | 0.53    |
| Northeast & Average income | -3.06***         | <0.001  | 0.73**          | 0.03    |
| Northeast & High income    | -3.65***         | <0.001  | -1.4***         | <0.001  |
| South & Low income         | -3.37***         | <0.001  | 3.51***         | <0.001  |
| South & Average income     | -3.59***         | <0.001  | 1.81***         | <0.001  |
| South & High income        | -4.91***         | <0.001  | 0.03            | 0.94    |
| West & Low income          | -2.88***         | <0.001  | 1.70**          | 0.04    |
| West & Average income      | -3.61***         | <0.001  | 0.38            | 0.44    |
| West & High income         | -2.38***         | <0.001  | -0.53           | 0.28    |

\*\*p<0.05; \*\*\*p<0.01.

**eTable 2** Results of ITS on trends in county-level, age-adjusted NCD premature mortality by race/ethnic groups, 1999-2017

| Group                                  | Trend prior 2010 |         | Trend post 2010 |         |
|----------------------------------------|------------------|---------|-----------------|---------|
|                                        | Coefficient      | p-value | Coefficient     | p-value |
| non-Hispanic white                     | -3.57***         | <0.001  | -0.53***        | <0.001  |
| non-Hispanic black or African American | -9.22***         | <0.001  | -2.41***        | <0.001  |
| Hispanic or Latino                     | -3.28***         | <0.001  | -0.61**         | 0.01    |

\*\*p<0.05; \*\*\*p<0.01.
